# Supplementary material
Source: Springer Nature journal article supplement (https://www.springermedizin.de/resource/supplementary/13045_2014_400_MOESM6_ESM.pdf/9661292)

**A**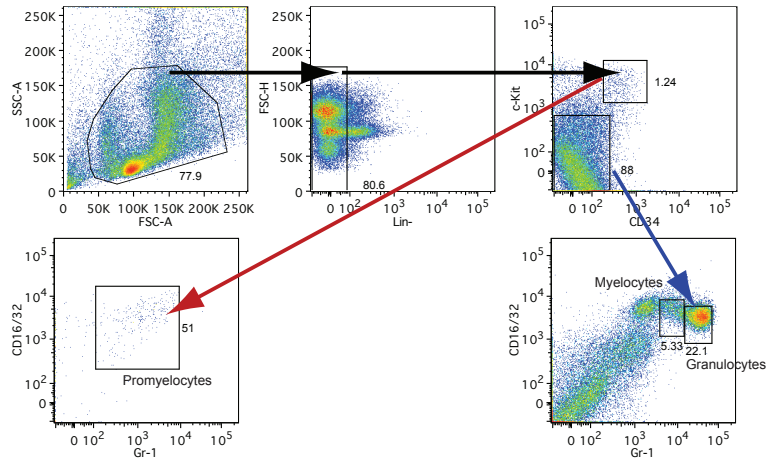**B**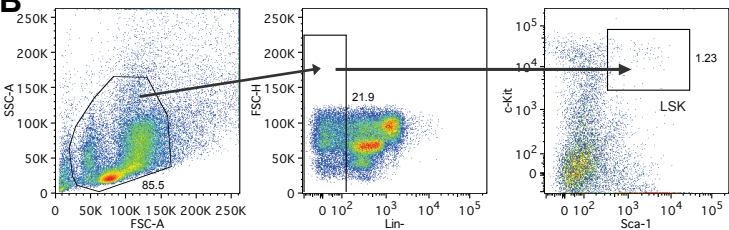**C**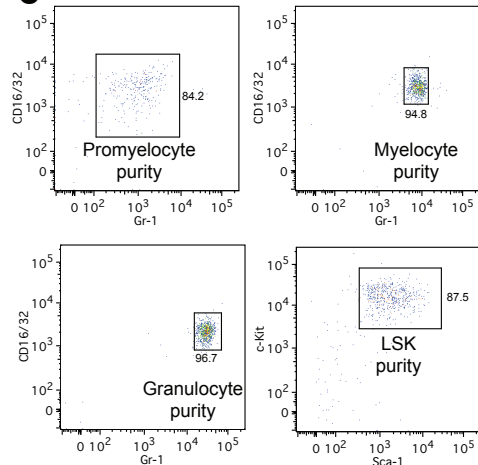**D**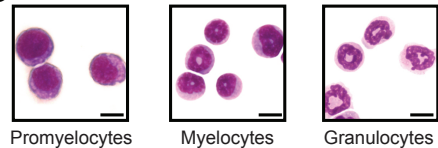

Supplement: MOESM6 [file 9661292]
